# Supplementary material for: Genetic and Clinical Studies of Peripheral Neuropathies with Three Small Heat Shock Protein Gene Variants in Korea
Source: MDPI journal article supplement (doi:10.3390/genes13030462), 2022-03-05
Supplement: s1 [file s1]

**Table S1** Interpretation of the variants according to the ACMG.

| Gene         | Family ID                | Variant                    |             | Interpretation                       | Conclusion |
|--------------|--------------------------|----------------------------|-------------|--------------------------------------|------------|
|              |                          | Nucleotide                 | Amino acid  |                                      |            |
| <i>HSPB1</i> | FC167                    | c.80G>C                    | p.R27P      | PM2+PP2+PP3                          | VUS        |
|              | FC1005                   | [c.380G>A] +<br>[c.424T>C] | [p.R127Q] + | PM1+PM2+PM5+PP2+PP3+PP4              | LP         |
|              |                          |                            | [p.Y142H]   | PM1+PM2+PM3+PP2+PP3+PP4              | LP         |
|              | FC371                    | c.382C>T                   | p.Q128X     | PM1+PM2+PP3                          | VUS        |
|              | FC189<br>FC522,<br>FC567 | c.404C>T                   | p.S135F     | PM1+PM2+PM5+PS1+PP1+PP2+PP3+PP4      | P          |
|              | FC313                    | c.544C>T                   | p.P182S     | PM1+PM2+ PS1+PS2+PP1+PP2+PP3+PP4+PP5 | P          |
|              | FC1150                   | c.560C>T                   | p.S187L     | PM2+PS1+PP2+PP3+PP4+PP5              | P          |
| <i>HSPB8</i> | HN104                    | c.236T>G                   | p.F79C      | PM2+PP3                              | VUS        |
|              | FC585<br>FC1196          | c.421A>G                   | p.K141E     | PM1+PM2+PS1+ PS3+PP1+PP3+PP4+PP5     | P          |
|              | FC031                    | c.422A>C                   | p.K141T     | PM1+PM2+PM5+ PS1+PS2+PP3+PP4         | P          |
|              | FC107                    | c.423G>T                   | p.K141N     | PM1+PM2+ PS1+PS3+PP1+PP3+PP4+PP5     | P          |
| <i>HSPB3</i> | FC702                    | c.352T>C                   | p.Y118H     | PM2+PP1+PP3+PP4                      | VUS        |

ACMG, the American College of Medical Genetics and Genomics; LP, likely pathogenic; P, pathogenic; VUS, variant of uncertain significance.

**Table S2.** Rare uncertain significant variants in three sHSP genes.

| Genes        | Type | Variants   |            | Mutant allele frequencies <sup>a</sup> |         |       | <i>In silico</i> analyses <sup>b</sup> |       |        | ACMG |
|--------------|------|------------|------------|----------------------------------------|---------|-------|----------------------------------------|-------|--------|------|
|              |      | Nucleotide | Amino acid | 1000G                                  | gnomAD  | KRGDB | PRO                                    | PP2   | MUp    |      |
| <i>HSPB1</i> | HNPP | c.80G>C    | p.R27P     | 0.0002                                 | 0.0002  | NR    | -3.81*                                 | 1.00* | -0.20* | VUS  |
|              | CMT1 | c.382C>T   | p.Q128X    | NR                                     | 1.1E-05 | NR    |                                        |       |        | VUS  |
| <i>HSPB8</i> | HNPP | c.236T>G   | p.F79C     | NR                                     | NR      | NR    | -0.55                                  | 0.88* | -0.59* | VUS  |

ACMG, guideline of the American College of Medical Genetics and Genomics; CMT1, Charcot-Marie-Tooth disease type 1; HNPP, hereditary neuropathy with liability to pressure palsies; NR, nonreported; VUS, variant of uncertain significance.

<sup>a</sup> Minor allele frequencies from the 1000 Genomes Project (1000G), the Genome Aggregation Database (gnomAD), and Korean Reference Genome Database (KRGDB).

<sup>b</sup> *In silico* scores of PolyPhen-2 (PP2) ~1, PROVEAN (PRO) <-2.5, and MUpro (MU) <0 indicate pathogenic prediction (\* denotes a pathogenic prediction).

**Table S3.** Phenotypic characterization of IPN patients with mutations in *HSPB1*, *HSPB8*, and *HSPB3* genes.

| Patients      | Disease type | Sex | Age of exam (yrs) | Age of onset (yrs) | First presenting symptom | FDS | CMTNSv2 | Muscle weakness  |                  | Muscle atrophy | Sensory loss | Knee/ankle jerks <sup>c</sup> | Pes cavus |
|---------------|--------------|-----|-------------------|--------------------|--------------------------|-----|---------|------------------|------------------|----------------|--------------|-------------------------------|-----------|
|               |              |     |                   |                    |                          |     |         | Arm <sup>a</sup> | Leg <sup>b</sup> |                |              |                               |           |
| <i>HSPB1</i>  |              |     |                   |                    |                          |     |         |                  |                  |                |              |                               |           |
| FC1005(II-5)  | dHMN2B       | M   | 56                | 45                 | Gait disturbances        | 1   | 4       | -                | +                | Yes            | No           | D/A                           | Yes       |
| FC189(IV-2)   | dHMN2B       | F   | 58                | 24                 | Gait disturbances        | 4   | 23      | ++               | +++              | Yes            | No           | A/A                           | Yes       |
| FC189(IV-4)   | dHMN2B       | F   | 51                | 25                 | Steppage gait            | 3   | 9       | ++               | +++              | Yes            | No           | A/A                           | Yes       |
| FC189(IV-13)  | dHMN2B       | F   | 62                | 22                 | Gait disturbance         | 7   | 31      | +++              | +++              | Yes            | No           | A/A                           | No        |
| FC189(IV-14)  | dHMN2B       | M   | 57                | 24                 | Lower limb weakness      | 3   | 12      | ++               | ++               | Yes            | No           | A/A                           | Yes       |
| FC189(IV-18)  | dHMN2B       | M   | 51                | 19                 | Paresthesia              | 3   | 17      | ++               | +++              | Yes            | No           | A/A                           | Yes       |
| FC189(V-2)    | dHMN2B       | F   | 39                | 18                 | Foot drop                | 3   | 14      | ++               | +++              | Yes            | No           | A/A                           | Yes       |
| FC189(V-3)    | dHMN2B       | M   | 38                | 19                 | Gait disturbances        | 3   | 24      | +                | ++               | Yes            | No           | A/A                           | Yes       |
| FC189(V-6)    | dHMN2B       | M   | 26                | 25                 | Steppage gait            | 1   | 5       | +                | ++               | Yes            | No           | D/A                           | Yes       |
| FC189(V-10)   | dHMN2B       | F   | 34                | 21                 | Steppage gait            | 2   | 10      | +                | ++               | Yes            | No           | A/A                           | Yes       |
| FC189(V-11)   | dHMN2B       | M   | 33                | 20                 | Gait disturbance         | 1   | 8       | +                | +                | Yes            | No           | A/A                           | No        |
| FC189(V-14)   | dHMN2B       | M   | 26                | 24                 | Foot drop                | 1   | 8       | -                | +                | Yes            | No           | N/N                           | Yes       |
| FC522(II-1)   | CMT2F        | M   | 35                | 22                 | Lower limb weakness      | 6   | 22      | ++               | ++               | Yes            | Yes          | A/A                           | Yes       |
| FC567(III-10) | CMT2F        | F   | 64                | 40                 | Lower limb weakness      | 4   | 23      | +++              | +++              | Yes            | Yes          | A/A                           | Yes       |
| FC567(IV-5)   | CMT2F        | M   | 42                | 27                 | Gait disturbance         | 1   | 4       | +                | ++               | Yes            | Yes          | D/A                           | No        |
| FC567(IV-11)  | CMT2F        | M   | 46                | 18                 | Lower limb weakness      | 1   | 5       | +                | ++               | Yes            | Yes          | A/A                           | Yes       |
| FC567(IV-13)  | CMT2F        | M   | 43                | 15                 | Slip down                | 4   | 20      | +++              | +++              | Yes            | Yes          | A/A                           | Yes       |
| FC313(II-1)   | CMT2F        | M   | 40                | 17                 | Foot drop                | 3   | 17      | ++               | +++              | Yes            | Yes          | N/A                           | Yes       |
| FC313(III-1)  | CMT2F        | F   | 13                | 11                 | Gait disturbance         | 1   | 5       | -                | +                | No             | Yes          | N/D                           | Yes       |
| FC1150(III-1) | CMT2F        | F   | 51                | 35                 | Lower limb weakness      | 1   | 6       | -                | +                | No             | No           | N/D                           | Yes       |
| <i>HSPB8</i>  |              |     |                   |                    |                          |     |         |                  |                  |                |              |                               |           |
| FC585(III-5)  | dHMN2A       | F   | 34                | 26                 | Gait disturbances        | 4   | 26      | ++               | +++              | Yes            | No           | A/A                           | Yes       |
| FC585(III-9)  | dHMN2A       | F   | 25                | 17                 | Lower limb weakness      | 2   | 13      | +                | ++               | Yes            | No           | H/N                           | Yes       |
| FC585(III-10) | dHMN2A       | M   | 32                | 19                 | Lower limb weakness      | 3   | 13      | +                | +++              | Yes            | No           | A/A                           | Yes       |

|                     |        |   |    |    |                      |   |    |     |     |     |     |     |     |
|---------------------|--------|---|----|----|----------------------|---|----|-----|-----|-----|-----|-----|-----|
| FC585(III-12)       | dHMN2A | F | 27 | 18 | Lower limbs weakness | 2 | 10 | +   | +   | Yes | No  | D/D | Yes |
| FC1196(II-1)        | dHMN2A | M | 30 | 19 | Steppage gait        | 2 | 10 | +   | ++  | Yes | No  | A/A | Yes |
| FC031(II-1)         | CMT2L  | M | 28 | 13 | Gait disturbances    | 6 | 21 | +++ | +++ | Yes | Yes | A/A | Yes |
| FC107(II-2)         | dHMN2A | M | 45 | 18 | Steppage gait        | 4 | 17 | ++  | +++ | Yes | No  | A/A | Yes |
| <b><i>HSPB3</i></b> |        |   |    |    |                      |   |    |     |     |     |     |     |     |
| FC702(III-1)        | CMT2   | M | 57 | 25 | Steppage gait        | 3 | 15 | +   | +++ | Yes | Yes | A/A | Yes |
| FC702(IV-2)         | CMT2   | F | 29 | 17 | Gait disturbances    | 2 | 9  | +   | ++  | Yes | Yes | A/A | Yes |

CMT2, Charcot-Marie-Tooth disease type 2; CMTNSv2, CMT neuropathy score ver. 2; dHMN, distal hereditary motor neuropathy; F, female; FDS, functional disability scale; M, male.

<sup>a</sup> Muscle weakness in upper limbs: + = intrinsic hand weakness 4/5 on medical research council (MRC) scale; ++ = intrinsic hand weakness <4/5 on MRC scale; +++ = proximal weakness; - = no symptom

<sup>b</sup> Muscle weakness in lower limbs: + = ankle dorsiflexion 4/5 on MRC scale; ++ = ankle dorsiflexion <4/5 on MRC scale; +++ = proximal weakness; - = no symptom

<sup>c</sup> Deep tendon reflexes: D = diminished; A = absent; N = normal, H = hyper reflex

**Table S4.** Electrophysiological values of IPN patients with mutations in *HSPB1*, *HSPB8*, and *HSPB3* genes.

| Patient       | Age at exam (yrs) | Disease duration (yrs) | Motor nerve conduction |            |             |            |                |            |              |            | Sensory nerve conduction |            |             |            |             |            |
|---------------|-------------------|------------------------|------------------------|------------|-------------|------------|----------------|------------|--------------|------------|--------------------------|------------|-------------|------------|-------------|------------|
|               |                   |                        | Median nerve           |            | Ulnar nerve |            | Peroneal nerve |            | Tibial nerve |            | Median nerve             |            | Ulnar nerve |            | Sural nerve |            |
|               |                   |                        | CMAP (mV)              | MNCV (m/s) | CMAP (mV)   | MNCV (m/s) | CMAP (mV)      | MNCV (m/s) | CMAP (mV)    | MNCV (m/s) | SNAP (μV)                | SNCV (m/s) | SNAP (μV)   | SNCV (m/s) | SNAP (μV)   | SNCV (m/s) |
| <i>HSPB1</i>  |                   |                        |                        |            |             |            |                |            |              |            |                          |            |             |            |             |            |
| FC1005(II-5)  | 56                | 11                     | 19.2                   | 61.5       | 13.9        | 61.5       | 0.2            | 32.8       | 0.5          | 41.3       | 41.3                     | 50.0       | 19.5        | 48.0       | 15.9        | 42.4       |
| FC189(IV-2)   | 58                | 34                     | A                      | A          | A           | A          | A              | A          | A            | A          | 23.1                     | 44.9       | 21.2        | 39.8       | 17.2        | 38.3       |
|               | 59                | 35                     | A                      | A          | A           | A          | A              | A          | 1.4          | 39.3       | 36.5                     | 44.1       | 23.6        | 39.1       | 17.8        | 36.0       |
| FC189(IV-4)   | 50                | 25                     | 6.8                    | 50.3       | 7.1         | 55.0       | A              | A          | A            | A          | 25.7                     | 40.8       | 17.8        | 39.0       | 24.5        | 34.3       |
|               | 51                | 26                     | 7.5                    | 50.3       | 5.9         | 53.7       | A              | A          | A            | A          | 32.0                     | 41.1       | 24.9        | 40.8       | 18.2        | 33.0       |
| FC189(IV-13)  | 61                | 39                     | 8.0                    | 45.8       | 1.1         | 41.2       | A              | A          | A            | A          | 36.8                     | 41.1       | 9.4         | 38.7       | 14.4        | 32.6       |
|               | 62                | 40                     | 2.8                    | 46.5       | A           | A          | A              | A          | A            | A          | 32.1                     | 41.6       | 16.7        | 37.8       | 14.8        | 34.5       |
| FC189(IV-14)  | 57                | 33                     | 7.0                    | 56.6       | 2.1         | 47.5       | A              | A          | A            | A          | 28.0                     | 41.2       | 11.9        | 38.9       | 19.3        | 32.6       |
|               | 65                | 31                     | 7.9                    | 51.7       | 0.8         | 50.8       | A              | A          | A            | A          | 33.4                     | 46.9       | 19.3        | 41.4       | 26.0        | 32.6       |
| FC189(IV-18)  | 50                | 31                     | 8.1                    | 47.8       | 0.3         | 42.0       | A              | A          | 0.3          | 25.2       | 37.6                     | 42.1       | 11.2        | 37.5       | 27.6        | 32.2       |
|               | 51                | 32                     | 2.1                    | 41.6       | 0.9         | 41.9       | A              | A          | A            | A          | 23.4                     | 39.6       | 12.5        | 39.9       | 13.9        | 33.6       |
| FC189(V-2)    | 38                | 20                     | 0.1                    | 38.2       | A           | A          | A              | A          | A            | A          | 43.9                     | 40.5       | 17.3        | 40.4       | 14.3        | 36.2       |
| FC189(V-3)    | 36                | 17                     | 1.4                    | 50.0       | 2.4         | 51.0       | A              | A          | A            | A          | 15.5                     | 43.2       | 12.4        | 40.1       | 10.5        | 37.4       |
|               | 37                | 18                     | 1.2                    | 49.1       | 2.1         | 50.0       | A              | A          | A            | A          | 30.6                     | 42.8       | 12.2        | 39.9       | 13.1        | 35.1       |
| FC189(V-6)    | 25                | 1                      | 18.6                   | 63.8       | 13.4        | 58.3       | 0.3            | 43.2       | 0.1          | 38.7       | 37.4                     | 47.3       | 16.9        | 41.7       | 26.6        | 34.3       |
| FC189(V-10)   | 35                | 14                     | 14.6                   | 59.3       | 12.3        | 55.8       | A              | A          | 0.2          | 30.8       | 26.6                     | 41.1       | 18.6        | 38.3       | 10.8        | 34.7       |
|               | 36                | 15                     | 14.8                   | 55.9       | 12.0        | 55.6       | A              | A          | 0.2          | 33.5       | 33.5                     | 41.8       | 21.1        | 38.9       | 13.2        | 34.3       |
| FC189(V-11)   | 33                | 13                     | 19.4                   | 58.7       | 18.1        | 50.0       | A              | A          | 0.9          | 42.0       | 20.5                     | 41.3       | 10.7        | 40.5       | 12.7        | 32.4       |
|               | 34                | 14                     | 20.1                   | 53.8       | 17.7        | 52.9       | A              | A          | 1.6          | 43.8       | 28.5                     | 43.2       | 13.3        | 40.5       | 23.7        | 34.4       |
| FC189(V-14)   | 26                | 2                      | 17.4                   | 59.8       | 13.6        | 59.0       | A              | A          | 0.7          | 31.2       | 26.7                     | 43.5       | 18.6        | 40.9       | 13.6        | 32.8       |
|               | 27                | 3                      | 19.5                   | 61.2       | 11.3        | 60.0       | A              | A          | 0.6          | 30.1       | 33.8                     | 44.9       | 27.2        | 41.4       | 13.4        | 38.1       |
| FC522(II-1)   | 34                | 12                     | 7.7                    | 61.5       | 4.5         | 52.1       | A              | A          | 0.7          | 29.5       | 29.1                     | 46.4       | 15.6        | 43.0       | 19.2        | 31.3       |
|               | 38                | 16                     | 8.8                    | 60.5       | 2.4         | 47.5       | A              | A          | 1.1          | 37.1       | 29.4                     | 52.5       | 14.2        | 50.8       | 13.7        | 46.7       |
| FC567(III-10) | 64                | 24                     | 3.2                    | 54.5       | 1.4         | 59.4       | A              | A          | A            | A          | 38.2                     | 44.9       | 30.2        | 43.1       | 29.8        | 45.5       |
| FC567(IV-5)   | 42                | 15                     | 12.8                   | 60.5       | 2.2         | 58.8       | 1.3            | 25.1       | 0.1          | 24.4       | 38.6                     | 42.3       | 18.5        | 38.6       | 28.2        | 30.6       |

|               |    |    |      |      |      |      |     |      |     |      |      |      |      |      |      |      |
|---------------|----|----|------|------|------|------|-----|------|-----|------|------|------|------|------|------|------|
|               | 43 | 16 | 15.1 | 54.6 | 1.8  | 49.8 | 0.2 | 36.2 | A   | A    | 72.5 | 51.7 | 26.2 | 46.7 | 28.8 | 42.4 |
|               | 45 | 18 | 14.9 | 57.3 | 2.2  | 47.8 | 0.2 | 37.8 | A   | A    | 58.0 | 48.3 | 23.3 | 47.2 | 21.6 | 46.7 |
| FC567(IV-11)  | 44 | 26 | 14.8 | 62.9 | 0.7  | 57.9 | A   | A    | A   | A    | 24.7 | 46.9 | 11.4 | 40.2 | 10.6 | 36.7 |
|               | 47 | 29 | 12.1 | 51.9 | 1.3  | 44.5 | A   | A    | A   | A    | 38.8 | 51.7 | 20.6 | 47.8 | 10.1 | 41.9 |
| FC567(IV-13)  | 42 | 27 | 12.2 | 61.8 | 0.8  | 54.2 | A   | A    | A   | A    | 22.4 | 44.1 | 18.8 | 40.3 | 26.3 | 37.0 |
| FC313(II-1)   | 40 | 33 | A    | A    | 0.6  | 27.3 | 1.3 | 33.7 | 0.5 | 36.2 | 12.0 | 40.0 | 10.9 | 40.0 | 22.8 | 35.7 |
| FC313(III-1)  | 13 | 2  | 3.3  | 50.7 | 10.3 | 51.5 | 0.3 | 49.0 | 7.8 | 42.1 | 27.6 | 35.8 | 20.4 | 44.2 | 1.3  | 38.9 |
|               | 15 | 4  | 3.6  | 48.9 | 12.9 | 43.8 | 0.9 | 47.2 | 6.3 | 41.3 | 27.4 | 32.7 | 21.7 | 44.3 | 1.5  | 40.0 |
| FC1150(III-1) | 51 | 16 | 20.0 | 59.5 | 13.7 | 62.2 | 3.9 | 43.4 | 3.4 | 46.0 | 39.0 | 56.4 | 41.1 | 46.1 | 5.5  | 40.0 |
| <b>HSPB8</b>  |    |    |      |      |      |      |     |      |     |      |      |      |      |      |      |      |
| FC585(III-5)  | 34 | 8  | 14.2 | 60.0 | 17.7 | 65.7 | A   | A    | A   | A    | 54.5 | 54.3 | 27.6 | 52.4 | 23.5 | 48.3 |
| FC585(III-9)  | 24 | 7  | 16.9 | 57.4 | 22.6 | 62.1 | 5.2 | 48.4 | 2.8 | 40.9 | 50.5 | 46.7 | 26.4 | 49.1 | 36.1 | 41.2 |
| FC585(III-10) | 32 | 13 | 10.3 | 49.8 | 17.0 | 59.6 | A   | A    | A   | A    | 20.9 | 37.6 | 26.5 | 48.5 | 18.1 | 36.8 |
| FC585(III-12) | 27 | 9  | 18.3 | 64.0 | 19.4 | 71.4 | 6.5 | 50.1 | 0.5 | 41.0 | 36.9 | 52.0 | 58.8 | 62.8 | 34.6 | 40.3 |
| FC1196(II-1)  | 30 | 11 | 18.7 | 63.4 | 15.0 | 58.7 | A   | A    | A   | A    | 40.7 | 52.0 | 20.6 | 48.0 | 20.0 | 43.8 |
| FC031(II-1)   | 15 | 2  | 7.2  | 46.9 | 4.7  | 52.4 | A   | A    | A   | A    | 3.2  | 32.2 | 6.0  | 47.0 | A    | A    |
|               | 26 | 13 | 4.4  | 46.2 | 5.3  | 55.3 | A   | A    | A   | A    | A    | A    | A    | A    | A    | A    |
|               | 27 | 14 | 4.7  | 45.3 | 5.2  | 54.5 | A   | A    | A   | A    | A    | A    | A    | A    | A    | A    |
| FC107(II-2)   | 44 | 16 | 15.0 | 57.7 | 3.4  | 50.0 | A   | A    | A   | A    | 48.6 | 48.5 | 36.7 | 45.6 | 31.3 | 43.8 |
| <b>HSPB3</b>  |    |    |      |      |      |      |     |      |     |      |      |      |      |      |      |      |
| FC702(IV-2)   | 27 | 2  | 20.0 | 53.3 | 13.5 | 56.7 | 0.8 | 42.7 | 0.5 | 39.6 | 4.4  | 44.3 | 8.7  | 40.7 | A    | A    |
|               | 29 | 12 | 22.9 | 49.6 | 19.3 | 52.9 | 2.5 | 32.3 | 0.6 | 32.9 | 8.4  | 40.0 | 7.2  | 37.9 | A    | A    |

A, absent action potential; CMAP, compound muscle action potential; MNCV, motor nerve conduction velocity; SNAP, sensory nerve action potential; SNCV, sensory nerve conduction velocity. Normal NCVs: motor median nerve,  $\geq 50.5$  m/s; ulnar nerve,  $\geq 51.1$  m/s; peroneal nerve,  $\geq 41.2$  m/s; tibial nerve,  $\geq 41.1$  m/s; sensory median nerve,  $\geq 39.3$  m/s; ulnar nerve,  $\geq 37.5$  m/s; sural nerve,  $\geq 32.1$  m/s. Normal amplitudes: motor median nerve  $\geq 6$  mV; ulnar nerve,  $\geq 8$  mV; peroneal nerve,  $\geq 1.6$  mV; tibial nerve,  $\geq 6$  mV; sensory median nerve,  $\geq 8.8$   $\mu$ V; ulnar nerve,  $\geq 7.9$   $\mu$ V; sural nerve,  $\geq 6.0$   $\mu$ V.
